# Supplementary material
Source: publisher site journal article supplement (https://www.dovepress.com/article/360608)
Supplement: Supplementary file 1 [file get_supplementary_file.php]

**Appendix 1. Interprofessional education workshop Quiz**

1. One of the most common food drug interactions:
2. Milk and non-steroidal anti-inflammatory drugs
3. Seafood and antibiotics
4. Grapefruit and statins
5. Vegetables and immunosuppressant
6. Drug-food interaction only increase the therapeutic effect of the medication
7. True
8. False
9. Warfarin interacts with:
10. Green Vegetables rich in potassium
11. Green Vegetables rich in vitamin K
12. Green Vegetables rich in Iodine
13. None of the above
14. Taking warfarin with green vegetables should be completely avoided.
15. True
16. False
17. Drug food interactions occur during:
18. Absorption phase
19. Elimination phase
20. Metabolism phase
21. All of the above
22. Grapefruit interactions usually:
23. Reduce the drug effect
24. Increase the drug effect
25. Cause hypertensive crises
26. None of the above.
27. Drug-nutrient interactions can occur inside and outside the body.
28. True
29. False

**Appendix 2. Cases administered to the students during the IPE session**

**Case 1:**

A 64-year-old man known to have osteoporosis, osteoarthritis, and atrial fibrillation (AF). He had been taking calcium carbonate/vitamin D for osteoporosis, Aspirin for osteoarthritis as needed, warfarin (65 mg/week) for AF since 2000, and Fish Oil (omega-3) as a supplement. The patient’s regular diet consists of dairy products, green vegetables, and sea food. This diet was maintained throughout his warfarin treatment and his international normalized ratios (INRs) were in therapeutic range (goal 2-3).

Due to his lack of exercise, he stated that he recently started going to the gym, and his gym instructor advised him to consume more fruits such as bananas, apples, strawberries, and grapefruit, and more vegetables, such as carrots, garlic, and tomatoes.

On the 11th of April 2019, he came to the clinic for regular checkup. The INR in that visit was 6.29. No medical complaints, medications, or adverse effects involving bleeding were noted at the time of the supratherapeutic result.

1. **List potential drug interaction(s) with warfarin, which may lead to changes in the INR.**

Foods

_______________________________________________________________

Over-the-counter medications

_______________________________________________________________

Complementary medicines

_______________________________________________________________

1. **What is mechanism of the identified drug food interaction?**
2. **What is potential consequence of such interaction?**
3. **What is your therapeutic\dietary recommendation?**
4. **When would you assess the success of your recommendation?**

**Case 2:**

Sara, a 52 year old obese woman had been prescribed ciprofloxacin 500 mg as one tablet every 12 hours for 1 week for the treatment of lower urinary tract infection (UTI). She had diabetes, and osteopenia. She is on Gliclazide 30 mg PO OD, Orlistat 120mg 3 times daily and Calcium carbonate 500 mg BID. Her neighbor advised her to take dairy products for her osteopenia and cinnamon and ginger for better glucose control.

She also stated taking cranberry caplets, because as per the advertisement she saw, it “cleanses and protects”.

Five days later, she came back to the clinic complaining that she is still having burning during urination. Urine sample taken and antibiotic resistance test was performed. Results from the lab showed that bacterial resistance to Ciprofloxacin was developed after it was sensitive one week ago.

**Vitals signs**

| Temp: 37.1 °C | Pulse: 88 BPM |
| --- | --- |
| BP : 120/80 mmHG | Ht 160 cm |
| RR : 16 BPM | Wt 70 kg  FBG 75 mg\dl |

**Lab tests**

**Urinalysis:** WBC High, nitrite positive, and large leukocyte esterase**.**

1. **List potential drug interaction(s) with ciprofloxacin, which may lead to resistance.**

Foods

_______________________________________________________________

Over-the-counter medications

_______________________________________________________________

Complementary medicines

_______________________________________________________________

1. **What is mechanism of the identified drug food interaction?**
2. **What is potential consequence of such interaction?**
3. **What is your therapeutic\dietary recommendation?**
4. **When would you assess the success of your recommendation?**
5. **What is the general recommendation for** **fluoroquinolones food interactions**?

**Case 3:**

A 30-year-old pregnant woman had received a diagnosis of primary hypothyroidism when she was 27 years of age and had been taking an essentially stable dose of levothyroxine (75 mcg/d) for at least 2 years. Throughout her pregnancy, the dose of levothyroxine was adjusted multiple times in response to her thyroid stimulating hormone levels.

Four weeks ago, she came to the clinic for routine check-up. Her lab test revealed that the Hemoglobin level was 9 g/ dL (normal range: 12-15.5 g/ dL) which confirm a diagnosis of Iron deficiency anemia. Simultaneously with the levothyroxine pill, she began taking prenatal multivitamins that contained iron (ferrous fumarate 60 mg), folic acid (1 mg) and other vitamins and minerals.

Three days ago, she was 16 weeks pregnant (second trimester) and visited the antenatal clinic complaining of cold intolerance, fatigue, and hair loss. Her thyroid stimulating hormone level was rechecked and found to be **elevated** (40.75 mU/L, normal range: 0.3-3 mU/L), with **low** free T4 level (8 pmol/L, normal range: 9-25 pmol/L); thus, the dose of levothyroxine was increased accordingly. When she visited the pharmacy to collect her new levothyroxine prescription, the patient admitted that she was taking all her pills together in the morning.

Yesterday, she had concerns about her irregularity in hormone levels and the dose adjustments. She talked to her friends, one of them advising her to drink Soybean milk to regulate her hypothyroidism.

**1.  List potential drug interaction(s) with levothyroxine, which may lead to sub-therapeutic effect.**

Foods

**__________________________________________________________________**

Over-the-counter medications

**__________________________________________________________________**

Complementary medicines

**__________________________________________________________________**

1. **What is mechanism of the identified drug-drug or drug-food interaction?**
2. **What is potential consequence of such interaction?**
3. **What is your therapeutic\dietary recommendation?**
4. **When would you assess the success of your recommendation?**

**Case 4:**

An 80 year old female was diagnosed with Alzheimer’s disease 2 years ago, epilepsy and type 2 diabetes 9 years ago. She had a history of stroke 2 years ago. She is taking sodium valproate 2 gm/day, Glicalzide 30mg/day, Metformin 500mg 3 times daily and aspirin 81mg daily. Her diabetes has been under fair control with a most recent hemoglobin A1c of 7.4%. Her daughter is her caregiver and she noticed that her memory’s deteriorating the last week with breakthrough seizures.

She came to the clinic worried about her mother even though she ensures that her mother doesn’t miss any dose.

She mentioned consulting a herbalist a while ago and he gave her omega 3 pills, gingko biloba and horse chestnut supplements. He also advised her to feed her mother more broccoli as it helps with the memory.

She gives her mother her pills together in the morning including medications and dietary supplements.

**1.         List potential drug interaction(s) with sodium valproate, which may lead to sub-therapeutic effect.**

Foods

**__________________________________________________________________**

Over-the-counter medications

**__________________________________________________________________**

Complementary medicines

**__________________________________________________________________**

1. **What is mechanism of the identified drug-drug or drug-food interaction?**
2. **What is potential consequence of such interaction?**
3. **What is your therapeutic\dietary recommendation?**
4. **When would you assess the success of your recommendation?**
